# Supplementary material
Source: HighWire-hosted journal article supplement (https://www.cmajopen.ca/highwire/filestream/81060/field_highwire_adjunct_files/1/2016-0159-2-at.pdf)
Supplement: 2016-0159-2-at.pdf [file 2016-0159-2-at.pdf]

**Appendix 2 (as supplied by the authors):** Predictors of stress tests within 2 years of having PCI using hierarchical models

| <b>Characteristics</b>                                       | <b>Stress test<br/>N=83,636</b> | <b>No stress test<br/>N=44,744</b> | <b>Odds ratio<br/>(95% CI)</b> |
|--------------------------------------------------------------|---------------------------------|------------------------------------|--------------------------------|
| <b>Demographics</b>                                          |                                 |                                    |                                |
| Age, mean ± SD, years                                        | 60.68 ± 11.25                   | 67.61 ± 12.73                      | 0.957 (0.956-0.958)            |
| Men                                                          | 74.9                            | 64.3                               | 1.21 (1.18-1.25)               |
| Residing in a rural area                                     | 14.1                            | 16.4                               | 0.88 (0.85-0.91)               |
| Teaching hospital                                            | 61.3                            | 75.9                               | 0.72 (0.59-0.87)               |
| Income quintile                                              |                                 |                                    |                                |
| 1 (lowest)                                                   | 18.6                            | 22.8                               | Reference                      |
| 2                                                            | 20                              | 21.5                               | 1.16 (1.11-1.21)               |
| 3                                                            | 20.1                            | 19.5                               | 1.24 (1.19-1.30)               |
| 4                                                            | 20.8                            | 18.6                               | 1.30 (1.25-1.36)               |
| 5 (highest)                                                  | 20.3                            | 17.3                               | 1.39 (1.33-1.45)               |
| <b>Procedure year</b>                                        |                                 | N/A                                | 0.96 (0.96-0.97)               |
| <b>Canadian cardiovascular society angina classification</b> |                                 |                                    |                                |
| 1                                                            | 4.7                             | 3.9                                | 1.19 (1.09-1.29)               |
| 2                                                            | 14.3                            | 11.9                               | 1.18 (1.10-1.26)               |
| 3                                                            | 12.6                            | 12.8                               | 1.04(0.98-1.11)                |
| 4+                                                           | 60.7                            | 62.8                               | 1.05 (0.99-1.12)               |
| <b>Cardiac risk factors and comorbidities</b>                |                                 |                                    |                                |
| Diabetes                                                     | 27.7                            | 36.3                               | 0.82 (0.79-0.84)               |
| Hypertension                                                 | 69.6                            | 79                                 | 0.94 (0.90-0.98)               |
| Hyperlipidemia                                               | 62.8                            | 64                                 | 1.17 (1.13-1.20)               |
| Myocardial Infarction                                        | 48.9                            | 55                                 | 0.86 (0.84-0.89)               |
| Heart failure                                                | 3.7                             | 11.8                               | 0.59 (0.56-0.63)               |
| History of stroke                                            | 1.1                             | 2.7                                | 0.77 (0.69-0.85)               |
| Peripheral vascular disease                                  | 4.1                             | 8.9                                | 0.75 (0.72-0.80)               |
| Renal failure                                                | 1.8                             | 5.5                                | 0.80 (0.73-0.87)               |
| Chronic obstructive pulmonary disease                        | 4.9                             | 10.5                               | 0.75 (0.71-0.79)               |
| Smoking history                                              | 53.2                            | 51.1                               | 0.86 (0.83-0.88)               |
| Mean Charlson's comorbidity index                            | 0.47 ± 1.05                     | 0.90 ± 1.58                        | 0.92 (0.90-0.93)               |
| <b>PCI characteristics</b>                                   |                                 |                                    |                                |
| Stent type                                                   |                                 |                                    |                                |

|                           |      |      |                  |
|---------------------------|------|------|------------------|
| Drug eluting stent        | 43.8 | 39   | Reference        |
| Bare metal stent          | 59.7 | 59.9 | 0.84 (0.81-0.87) |
| Number of stented vessels |      |      |                  |
| 1                         | 46.7 | 48   | Reference        |
| 2                         | 49.4 | 44.3 | 1.02 (0.98-1.06) |
| ≥3                        | 3.9  | 7.7  | 0.97 (0.92-1.01) |
| Stent size                |      |      |                  |
| <3mm diameter             | 46.7 | 48   | Reference        |
| ≥3mm diameter             | 49.4 | 44.3 | 1.05 (1.01-1.08) |
| Total stent length        |      |      |                  |
| <20 mm                    | 34.8 | 33.2 | Reference        |
| ≥20 mm                    | 61.2 | 59.1 | 0.96 (0.92-0.99) |

\* Abbreviations: CI, confidence intervals; SD, standard deviation; N/A, not applicable.
